# Supplementary material for: Novel Al2O3–SiO2composite aerogels with high specific surface area at elevated temperatures with different alumina/silica molar ratios prepared by a non-alkoxide sol–gel method
Source: Royal Society of Chemistry journal article supplement (doi:10.1039/c5ra19764c), 2015-12-24
Supplement: c5ra19764c1.pdf [file c5ra19764c1.pdf]

## Supplementary Information

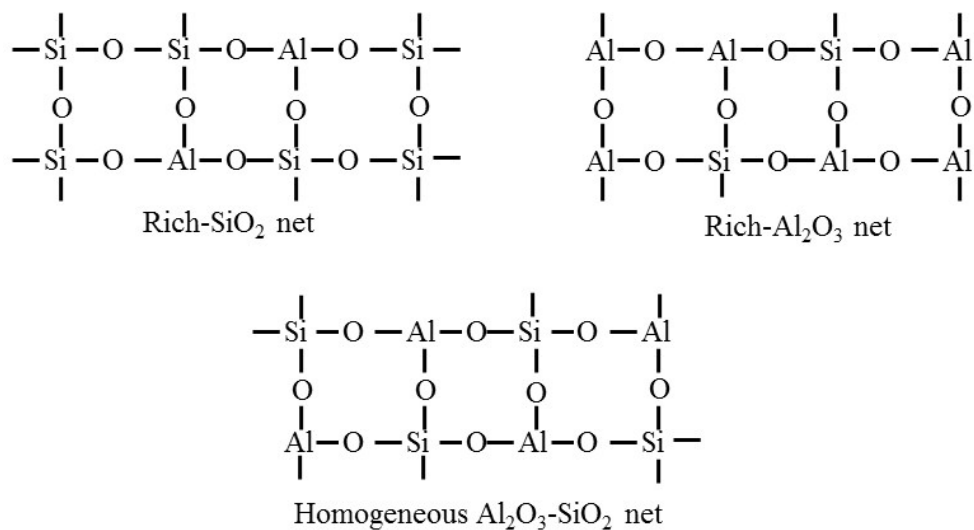

Fig. S1 Different Al-Si net sketches within Al<sub>2</sub>O<sub>3</sub>-SiO<sub>2</sub> composite gel

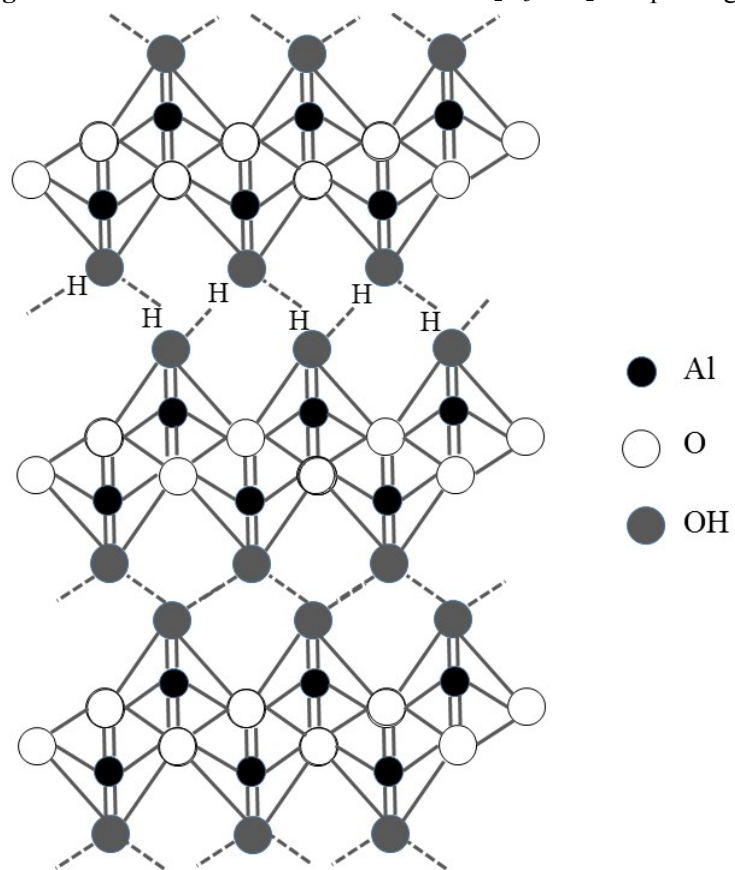

Fig. S2 Schematic diagrams of the AlOOH lamellar structure

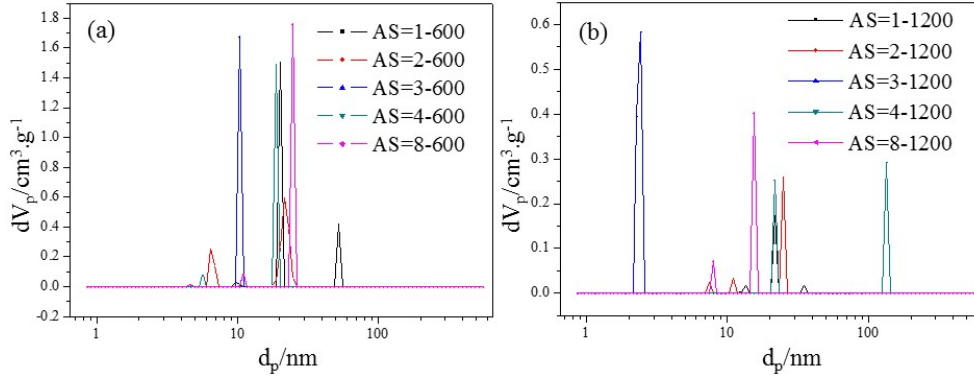

**Fig. S3** Pore size distributions calculated by NLDFT method of  $\text{Al}_2\text{O}_3$ - $\text{SiO}_2$  composite aerogel with different Al/Si molar ratios heat-treated at (a) 600 °C and (b) 1200 °C

**Table S1** Some experimental values of the composite aerogels with different Al/Si molar ratios

| Material | Bottom radius/cm | Upside radius/cm | Height/cm | Mass/g | Volume/cm <sup>3</sup> | Density/(g.cm <sup>-3</sup> ) |
|----------|------------------|------------------|-----------|--------|------------------------|-------------------------------|
| AS=8     | 2.050            | 1.900            | 3.200     | 2.078  | 39.212                 | 0.053                         |
| AS=4     | 2.000            | 1.800            | 3.100     | 2.260  | 35.172                 | 0.064                         |
| AS=3     | 2.000            | 1.750            | 3.200     | 2.694  | 35.377                 | 0.076                         |
| AS=2     | 2.000            | 1.700            | 2.800     | 2.559  | 30.157                 | 0.085                         |
| AS=1     | 2.000            | 1.750            | 2.800     | 2.963  | 30.955                 | 0.096                         |

**Table S2** Thermal performance parameters of the mullite fiber mat reinforced  $\text{Al}_2\text{O}_3$ - $\text{SiO}_2$  composite aerogel composites with different Al/Si molar ratios

| Al/Si molar ratios | Thermal conductivity (W.m <sup>-1</sup> .K <sup>-1</sup> ) | Thermal diffusivity (mm <sup>2</sup> /s) | Specific heat capacity (cm <sup>3</sup> /g) |
|--------------------|------------------------------------------------------------|------------------------------------------|---------------------------------------------|
| 2                  | 0.023                                                      | 1.489                                    | 0.016                                       |
| 3                  | 0.029                                                      | 1.237                                    | 0.024                                       |
| 8                  | 0.025                                                      | 1.758                                    | 0.015                                       |
